# Supplementary material for: Preparation of rod-like calcium titanyl oxalate with enhanced electrorheological activity and their morphological effect
Source: Royal Society of Chemistry journal article supplement (doi:10.1039/c4tc00691g), 2014-01-01
Supplement: c4tc00691g1.pdf [file c4tc00691g1.pdf]

## Electronic Supplementary Information

### Preparation of rod-like calcium titanyl oxalate with enhanced electrorheological activity and their morphological effect

Jinghua Wu, Ting Jin, Fenghua Liu, Jianjun Guo, Yuchuan Cheng\*, Gaojie Xu\*

*Ningbo Institute of Materials Technology and Engineering, Chinese Academy of Sciences, Ningbo,  
315201, P.R. China*

*E-mail: yccheng@nimte.ac.cn; xugj@nimte.ac.cn; Fax: +86 574 87911138; Tel: +86 574 87911138*

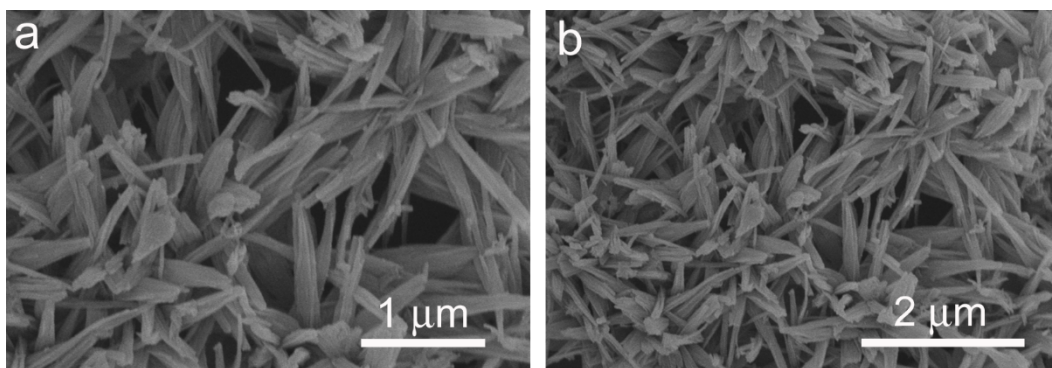

**Fig. S1** SEM of SCTO particles at different magnifications (2 wt% SDBS).

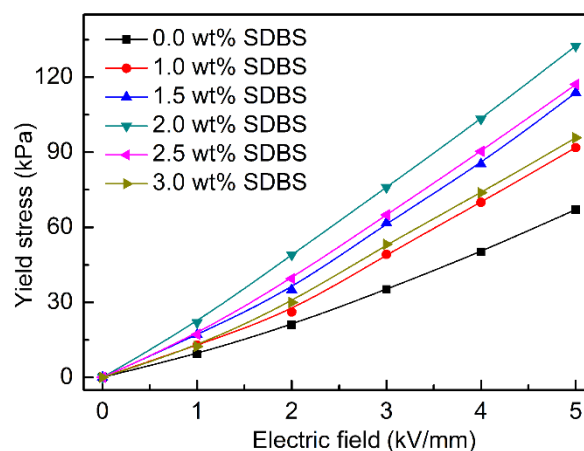

**Fig. S2** Yield stress of SCTO ER fluids (68 wt%) with different SDBS dosages as a function of applied electric field.

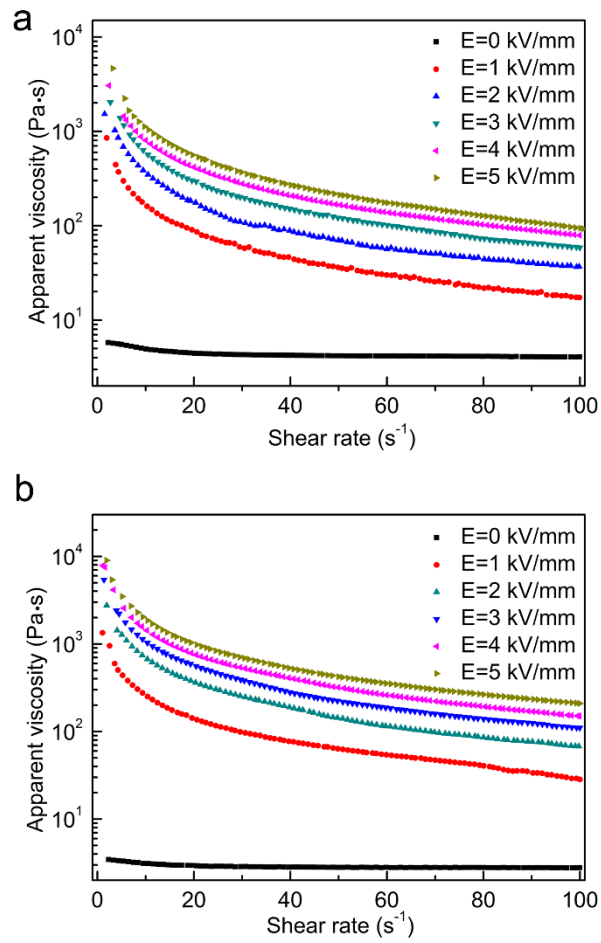

**Fig. S3** Apparent viscosity of SCTO ER fluids (46 wt%) as a function of shear rate under various electric fields (a: SDBS 0wt%, b: SDBS 2wt%).
